# Supplementary material for: Review of pyronaridine anti-malarial properties and product characteristics
Source: Malar J. 2012 Aug 9;11:270. doi: 10.1186/1475-2875-11-270 (PMC3483207; doi:10.1186/1475-2875-11-270)
Supplement: Additional file 7 — Efficacy of oral pyronaridine combination therapy in patients with P. falciparum malaria. [file 1475-2875-11-270-S7.doc]

**Additional file 7**

Efficacy of oral pyronaridine combination therapy in patients with *P. falciparum* malaria .

| **Reference** | **N** | **Treatment regimen, total dose, mgkg /daysa** | **Mean time to fever clearance, h  SD** | **Mean time to parasite clearance, h  SD** | **Recrudescenceb at follow up, n/N (% Cure)** |
| --- | --- | --- | --- | --- | --- |
| **Pyronaridine plus sulphadoxinepyrimethamine (Hainan Province)** | | | |  |  |
| Shao *et al* | 29 | 800+1000+50 /2 | 38.4  20.1c | 41.9  9.7 | 0/20 (100) |
|  | 32 | 500+1500+75 /1 | 37.6  19.6 | 46.6  9.1 | 0/25 (100) |
|  | 40 | 500+1000+50 /1 | 30.1  15.1 | 48.7  9.9 | 0/32 (100) |
| Chen and Zheng | 44 | 1200+1000+25 /3 | 37.1  17.8 | 40.9  8.9 | 1/37 (97.3) |
|  | 33 | 900+1500+75 /3d | 21.3  12.7 | 71.1  18.6 | 0/33 (100) |
|  | 40 | 800+100+50 /2 | 35  12 | 49  14 | 0/39 (100) |
|  | 39 | 800+1000+50 /2 | 30.3  24.7 | 52.7  15.8 | 0/37 (100) |
|  | 36 | 240e+1000+50 /2 | 38.8  23.0 | 51.8  14.4 | 0/35 (100) |
|  | 20 | 500+1500+75 /1 | 41.8  20.9 | 46.5  10.1 | 0/16 (100) |
|  | 41 | 500+1000+50 /1 | 37.0  21.8f | 47.3  10.3f | 0/16 (100) |
|  | 41 | 400+1000+50 /1 | 44.6  22.8 | 51.6  10.9 | 0/39 (100) |
|  | 30 | Control: S/P 1500+75 /1 | 58.6  27.2f | 53.3  10.1f | 6/25 (76.0) |
|  | 32 | Control: PRN 1200 /3 | 30.2  13.8 | 57.9  8.9 | 2/25 (92.0) |
| **Pyronaridine plus sulphadoxineprimaquine (Yunnan Province)** | | | | | |
| Chen and Zheng | 48 | 1200+1000+45 /2d | 32.0  16.3 | 58.7  20.8 | 1/40 (97.5) |
|  | 34 | 1200+1500+67.5 /3 | 25.5  19.1 | 58.0  15.3 | 2/31 (93.5) |
|  | 32 | Control: PRN/S/P 800+1000+50 /2 | 37.3  17.6 | 59.8  18.9 | 4/30 (86.7) |
| **Pyronaridine plus nitroquine (Hainan Province)** | | | | | |
| Chen *et al* | 11 | 600+25 | 33.0  30.3 | 53.1  18.5 | 2/11 (81.8) |
|  | 43 | 800+40 | 31.1  15.0 | 45.8  5.3 | 7/43 (83.7) |
|  | 31 | 800+80 | 35.0  17.3 | 48.7  12.1 | 4/31 (87.1) |
|  | 33 | Control: PQ/NQ 750+50 | 38.7  18.3 | 49.5  12.8 | 9/33 (72.7) |
|  | 7 | Control: PQ/NQ 975+32.5 | 47.7  23.5 | 56.7  20.5 | 3/7 (57.1) |
|  | 42 | Control: PRN 1200 | 32.9  12.4 | 48.3  23.3 | 5/42 (88.1) |
|  | 5 | Control: PQ 750 | 46.3  53.0 | >122.0  47.9 | 4/5 (20) |
| **Pyronaridine plus dihydroartemisinin** | | | | | |
| Liu *et al* | 32 | 800+300 /3g | 35.7  24.7 | 23.8  10.1 | 0 (100) |
|  | 25 | Control: PRN 1600 /3d | 35.8  16.5 | 49.4  20.3 | 0 (100) |
|  | 24 | Control: DHA 640 /7d | 52.6  38.9 | 22.9  6.5 | 1/24 (95.8) |
| **Pyronaridine plus artesunate (co-formulation)** | | | | | |
| Ramharter *et al* | 14 | Mean dose 6.3+2.1 (ratio 6:2)/3 tablet | median 16 h | – | 0/11 (100)h |
|  | 15 | Mean dose 9.9+3.3 (ratio 9:3)/3 tablet | median 16 h | – | 0/13 (100)h |
|  | 15 | Mean dose 13.2/4.8 (ratio 12:4)/3 tablet | median 8 h | – | 0/15 (100)h |
|  | 15 | Mean dose 11.4+3.8 (ratio 9:3)/3 granules | median 8 h | – | 0/14 (100)h |

| Tshefu *et al* [121] |  | Pyramax (pyronaridine plus  artesunate 180:60‑mg) tablets  Range:7.2:2.4 mg/kg to 13.8:4.6 mg/kg  N= 849 Pyramax | 7.9 h | 23.9 h | 4/784 (99.5)i |
| --- | --- | --- | --- | --- | --- |
|  |  |  |  |  |  |
| Rueangweerayut *et al* |  | Pyramax (pyronaridine plus  artesunate 180:60‑mg) tablets  Range:7.1:2.4 mg/kg to 14.0:4.7 mg/kg  N= 848 Pyramax | 15.7 hj | 31.7 hj | 6/749 (99.2)i |

aPyronaridine+sulphadoxine+pyrimethamine, pyronaridine+sulphadoxine+primaquine, pyronaridine+nitroquine or pyronaridine+dihydroartemisinin dose in mg as sub-titled unless stated otherwise.

bAt Day 28, cases of re-infection were not excluded

cN = 27

dTwo doses given on Day 0

ePyronaridine given IM

f*P* < 0.001 for fever clearance and *P* < 0.05 for time to aparasitaemia

g400/100 mg pyronaridine+dihydroartemisinin on Day 0, 400+100 mg on Days 1 and 2.

CLR, chloroquine; DHA, dihydroartemisinin; NQ, nitroquine; P, pyrimethamine; PQ, piperaquine; PRN, pyronaridine; PRQ, primaquine; S sulphadoxine

hCure at Day 28, PCR-corrected (i.e. cases of reinfection were excluded)

iPCR corrected ACPR (efficacy evaluation population)

j Includes data from Cambodia

, not reported in paper
